# Supplementary material for: A dual-functional catalyst: wood-templated BiVO4–CdS for wood dye wastewater
Source: Royal Society of Chemistry journal article supplement (doi:10.1039/d2ra06735h), 2023-01-01
Supplement: d2ra06735h1.pdf [file d2ra06735h1.pdf]

## **A dual-functional catalyst: Wood-templated BiVO<sub>4</sub>-CdS for wood dye wastewater**

Guangda Xia<sup>a</sup>, Sichen Xiao<sup>a</sup>, Junjie Su<sup>a</sup>, Hui Zhou<sup>a</sup>, Yu Liu<sup>a,\*</sup>, Xiaodong Zhu<sup>b</sup>

<sup>a</sup> *College of Material Science and Engineering, Northeast Forestry University, Harbin 150040, China*

<sup>b</sup> *Key Laboratory of Bio-based Material Science and Technology (Northeast Forestry University), Ministry of Education, Harbin 150040, China*

\* *Corresponding author: liuyu820524@126.com*

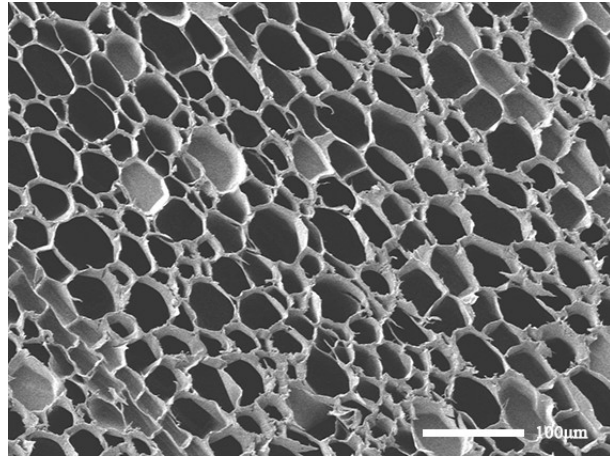

**Figure S1.** SEM image of the original balsa wood.

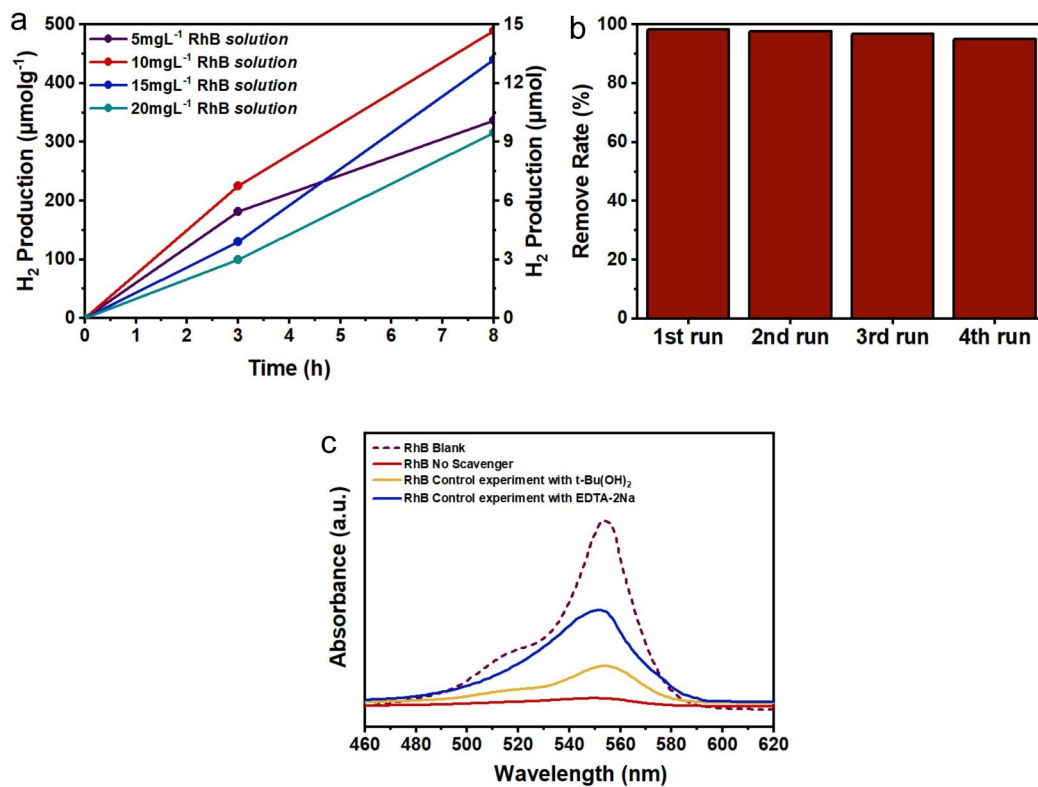

**Figure S2.** Photocatalytic hydrogen production of BBC-3 in aqueous RhB solutions with different concentrations (a); Cycle runs of RhB degradation over the BBC-3 under visible light irradiation for 4h (b); Trapping experiments of active species (c).

**Table S1**

Absorption wavelength and band gap of the prepared catalysts.

| Sample            | Absorption wavelength (nm) | Band gap (eV) |
|-------------------|----------------------------|---------------|
| BiVO <sub>4</sub> | 510.80                     | 2.47          |
| CdS               | 584.60                     | 2.27          |
| BC                | 546.72                     | 2.44          |
| BBC-1             | 561.6                      | 2.39          |
| BBC-2             | 573.65                     | 2.33          |
| BBC-3             | 579.12                     | 2.31          |
| BBC-4             | 569.05                     | 2.36          |
